# Supplementary material for: Exploring the effect of C6H5−x/FxBr (x = 0–3) passivating agent on surface properties at different termination ends: first principles
Source: Royal Society of Chemistry journal article supplement (doi:10.1039/d3cp03373b), 2023-01-01
Supplement: d3cp03373b1.pdf [file d3cp03373b1.pdf]

# Exploring the Effect of $C_6H_{5-x}F_xBr$ ( $x=0\sim3$ ) Passivating Agent on Surface Properties at Different Termination: First principles

Changcheng Chen<sup>a,\*</sup>, Yan Cai<sup>a</sup>, Yirui Zhang<sup>b</sup>, Ziyi Zhang<sup>a</sup>, Songya Wang<sup>a</sup>, Shuli Gao<sup>a</sup>, Wen Chen<sup>a</sup>,  
Shuangna Guo<sup>a</sup>, Elyas Abduryim<sup>a</sup>, Chao Dong<sup>c</sup>, Xiaoning Guan<sup>c,\*</sup>, Ying Liu<sup>d</sup>, Pengfei Lu<sup>c,\*</sup>

<sup>a</sup> School of Science, Xi'an University of Architecture and Technology, Xi'an 710055, Shaanxi, China.

<sup>b</sup> School of Information and Communication Engineering, Beijing University of Posts and Telecommunications, Beijing, 100080, China.

<sup>c</sup> State Key Laboratory of Information Photonics and Optical Communications, Beijing University of Posts and Telecommunications, Beijing, 100876, China.

<sup>d</sup> School of physics and Optoelectronic Engineering, Ludong University, Yantai, 264025, China.

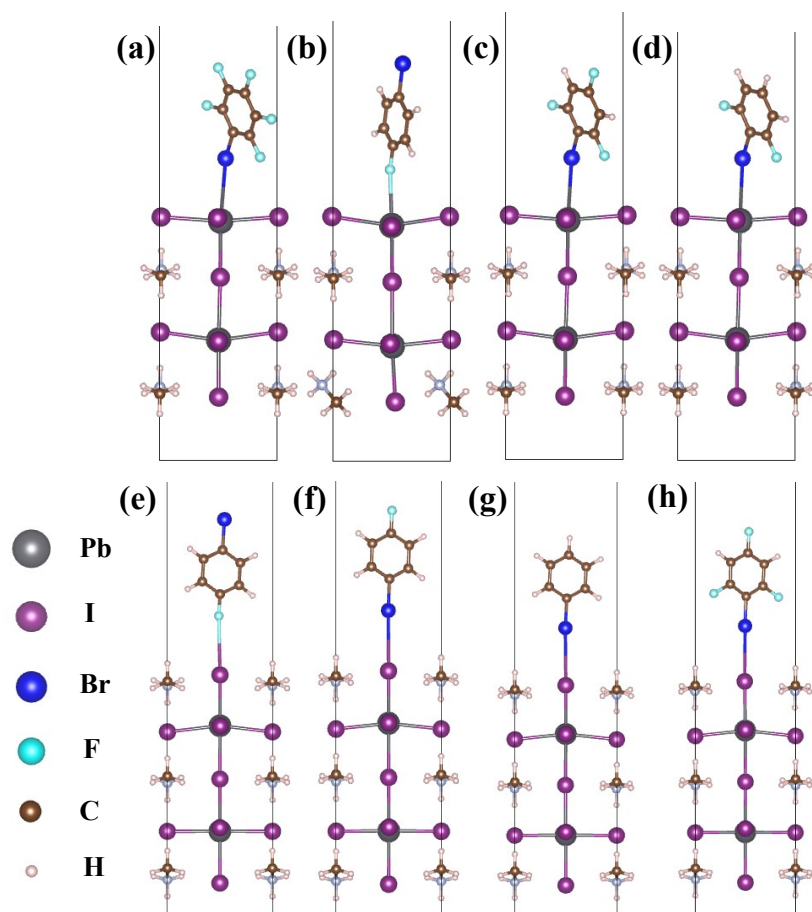

**Fig. S1.** Passivation models for different terminals of perovskite. (a)-(d) represents the addition of BrPFB, 4-F-BrB, 2-4-6-F-BrB and 2-6-F-BrB on the PbI<sub>2</sub>-terminated surface. (e)-(h) represents the addition of 4-F-BrF, 4-Br-BrF, BrB and 2-4-6-F-BrB on the MAI-terminated surface.

\* Corresponding authors E-mail addresses: [chenchangcheng@xauat.edu.cn](mailto:chenchangcheng@xauat.edu.cn) (C. Chen), [guanxn@bupt.edu.cn](mailto:guanxn@bupt.edu.cn) (X. Guan), [photon.bupt@gmail.com](mailto:photon.bupt@gmail.com) (P. Lu).

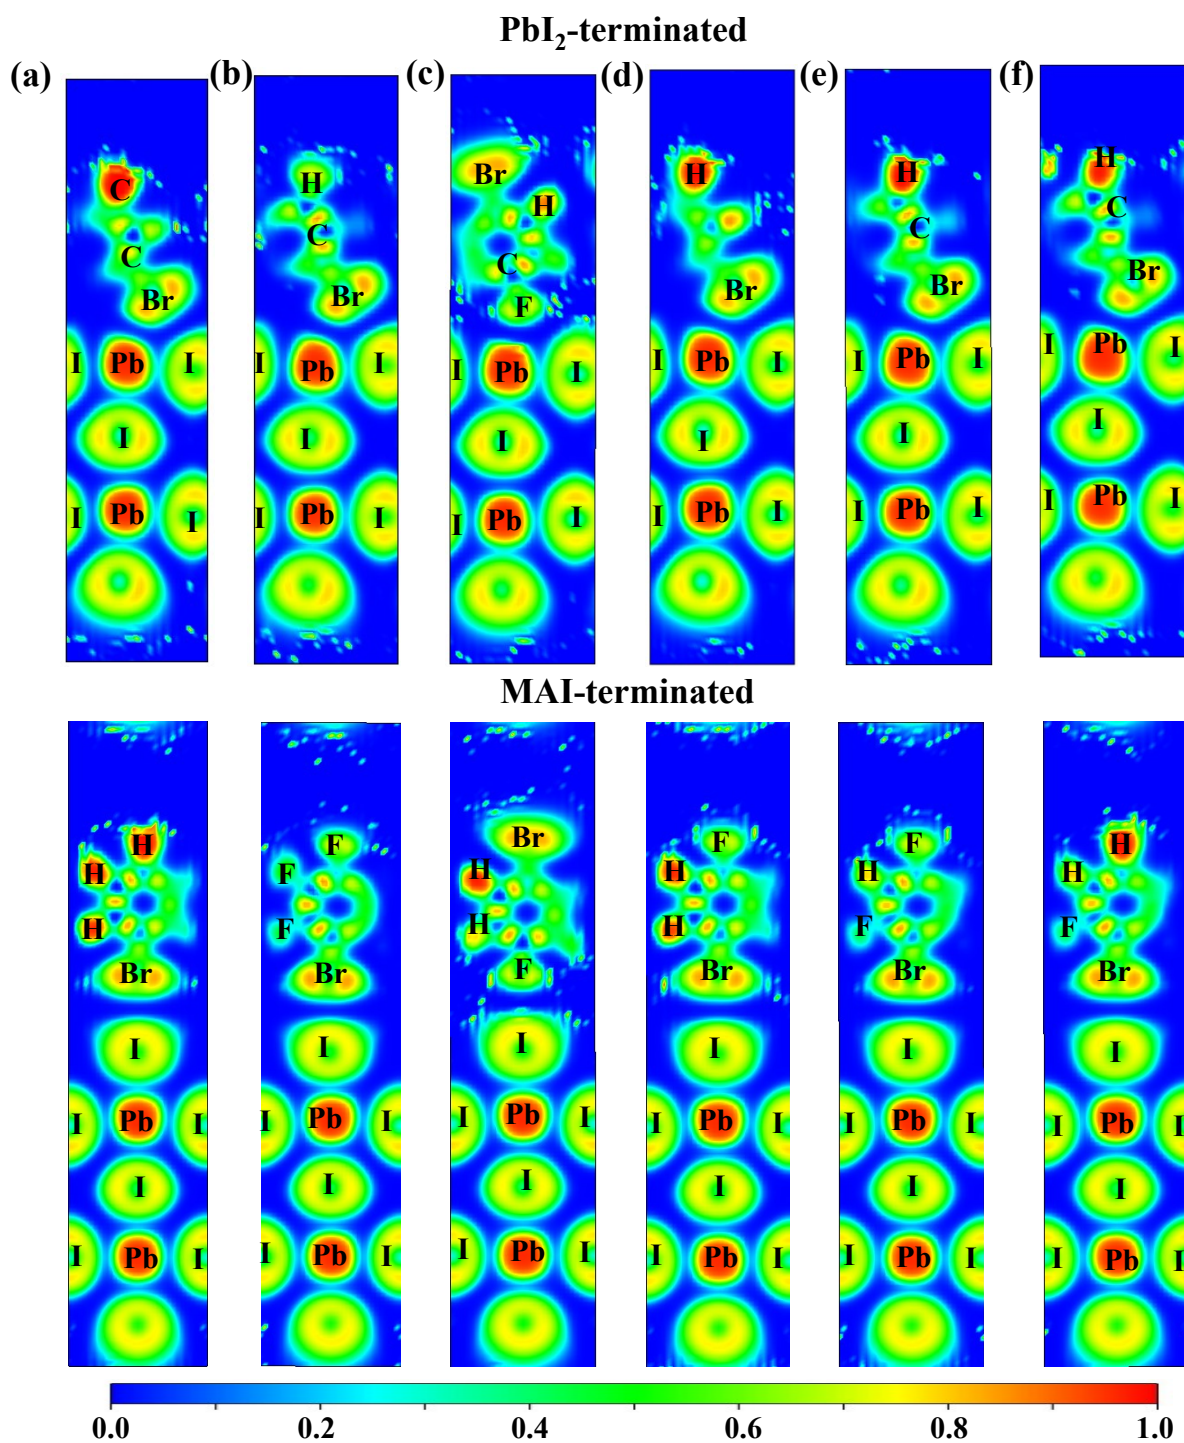

**Fig. S2.** The side view of the electron localization function at PbI<sub>2</sub> and MAI terminated surface, (a)-(f) adsorbed BrB, BrPFB, 4-F-BrB, 4-Br-FB, 2-4-6-F-BrB, and 2-6-F-BrB, respectively. The threshold range of the contour line is [0 (blue), 1 (red)], where 1 represents complete positioning and 0 represents incomplete positioning.

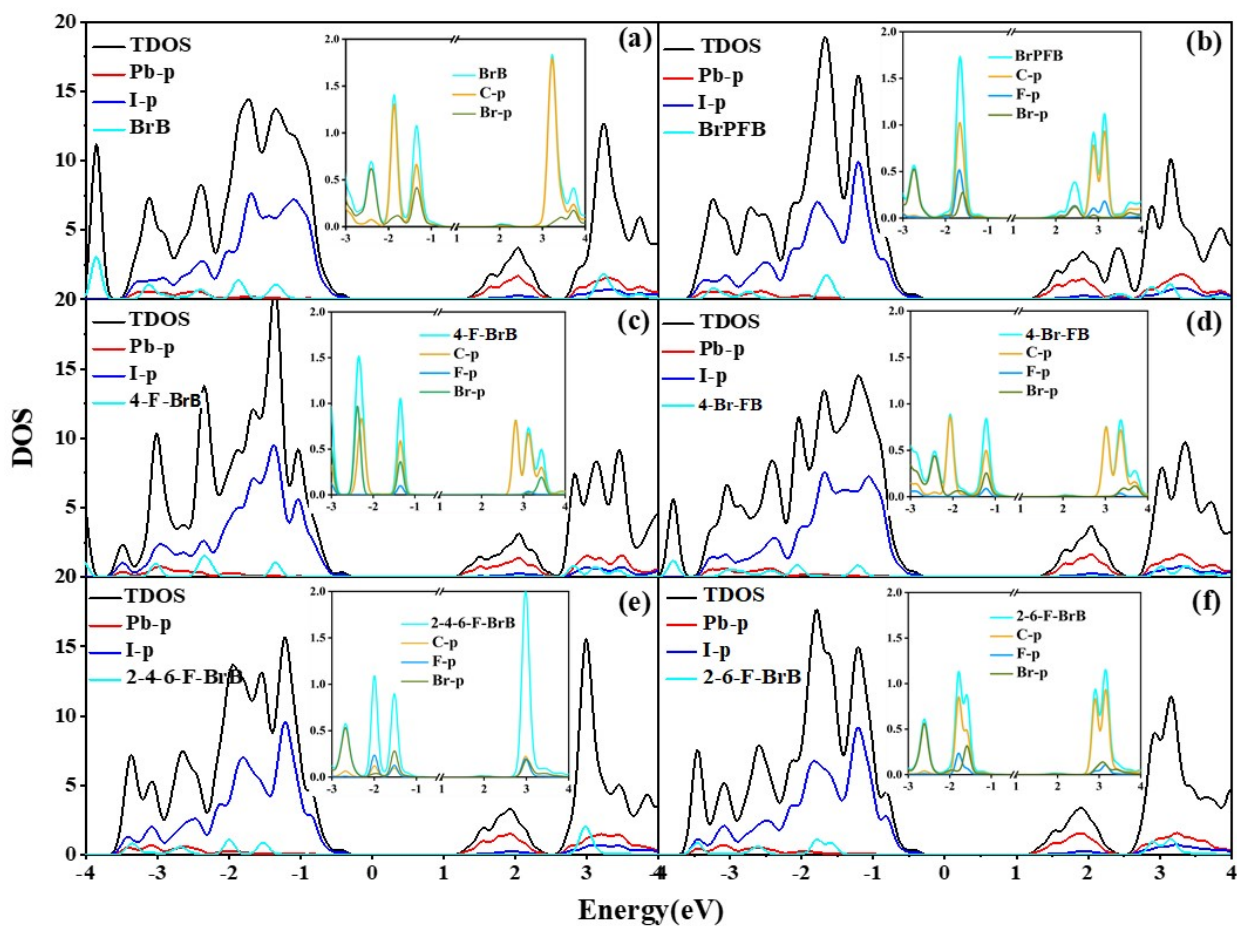

**Fig. S3.** The partial densities of states at the MAI-terminated surface with the addition of BrB, BrPFB, 4-F-BrB, 4-Br-FB, 2-4-6-F-BrB, and 2-6-F-BrB, respectively.

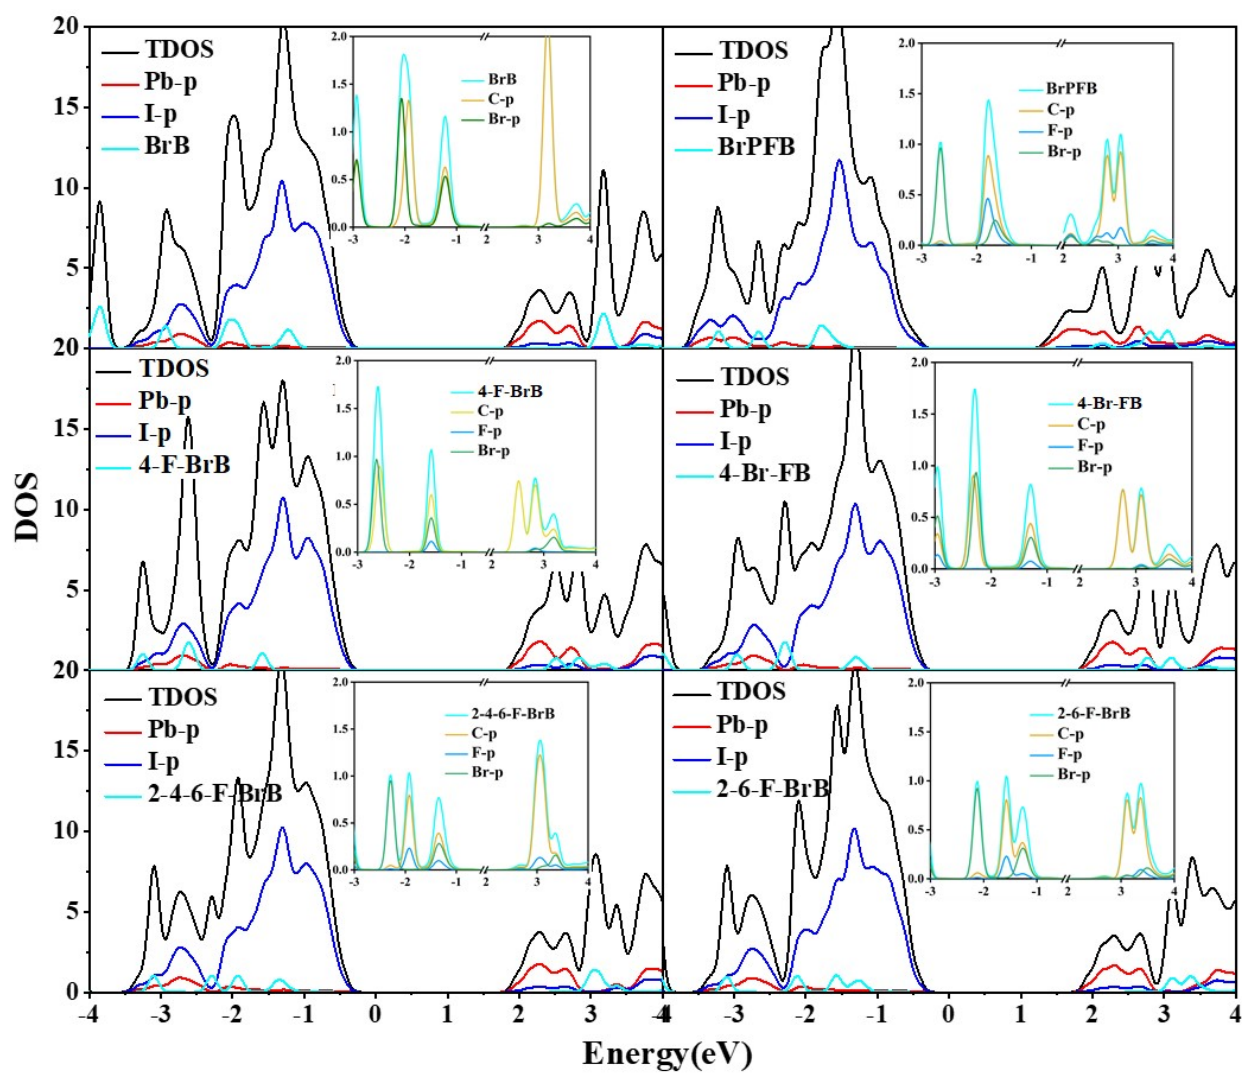

**Fig. S4.** The partial densities of states at the  $\text{PbI}_2$ -terminated surface with the addition of BrB, BrPFB, 4-F-BrB, 4-Br-FB, 2-4-6-F-BrB, and 2-6-F-BrB, respectively.

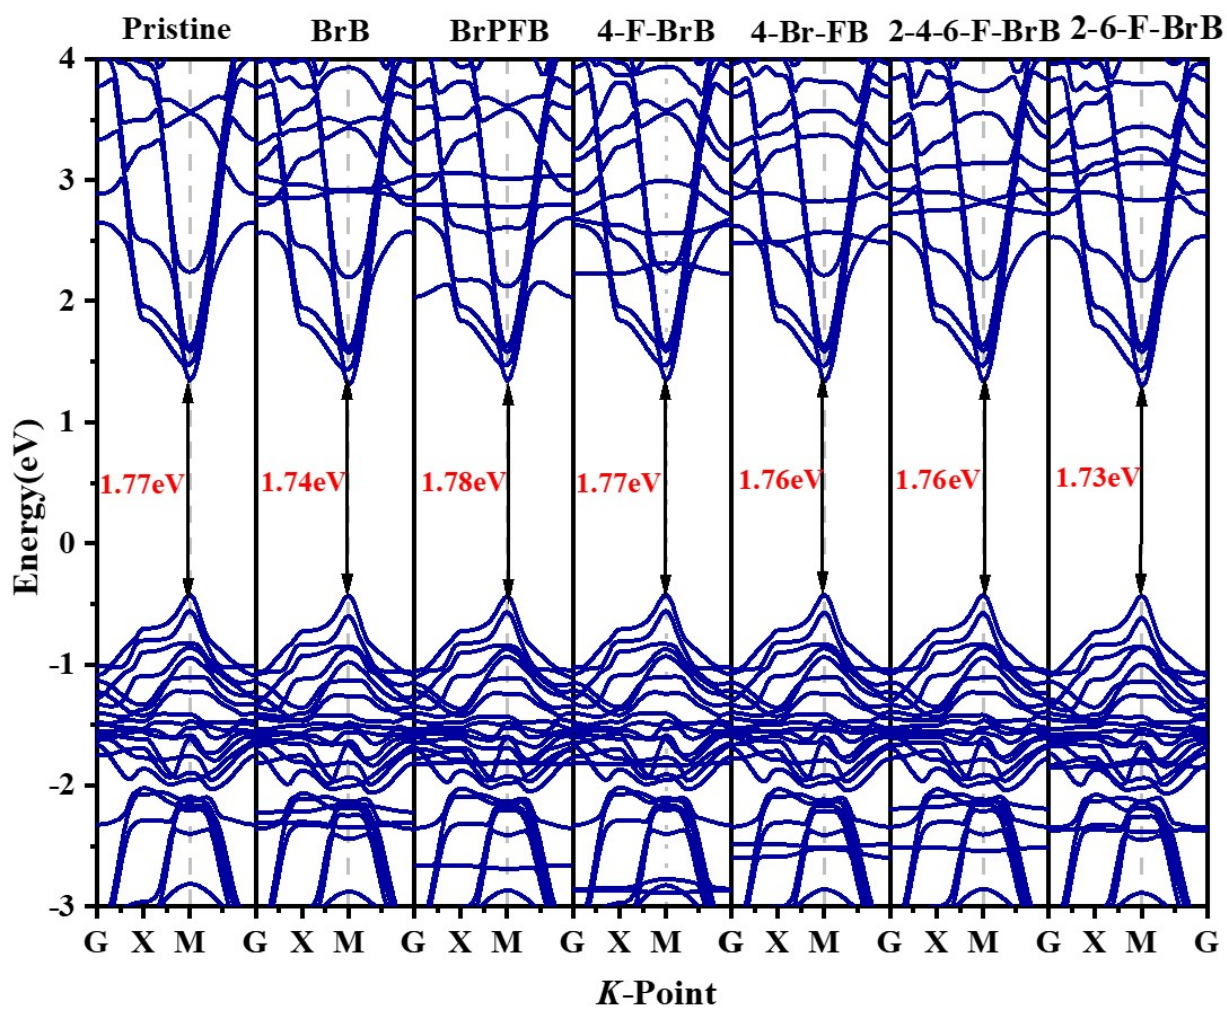

**Fig. S5.** Band structures is displayed at the MAI-terminated surface with the addition of BrB, BrPFB, 4-F-BrB, 4-Br-FB, 2-4-6-F-BrB, and 2-6-F-BrB, respectively.

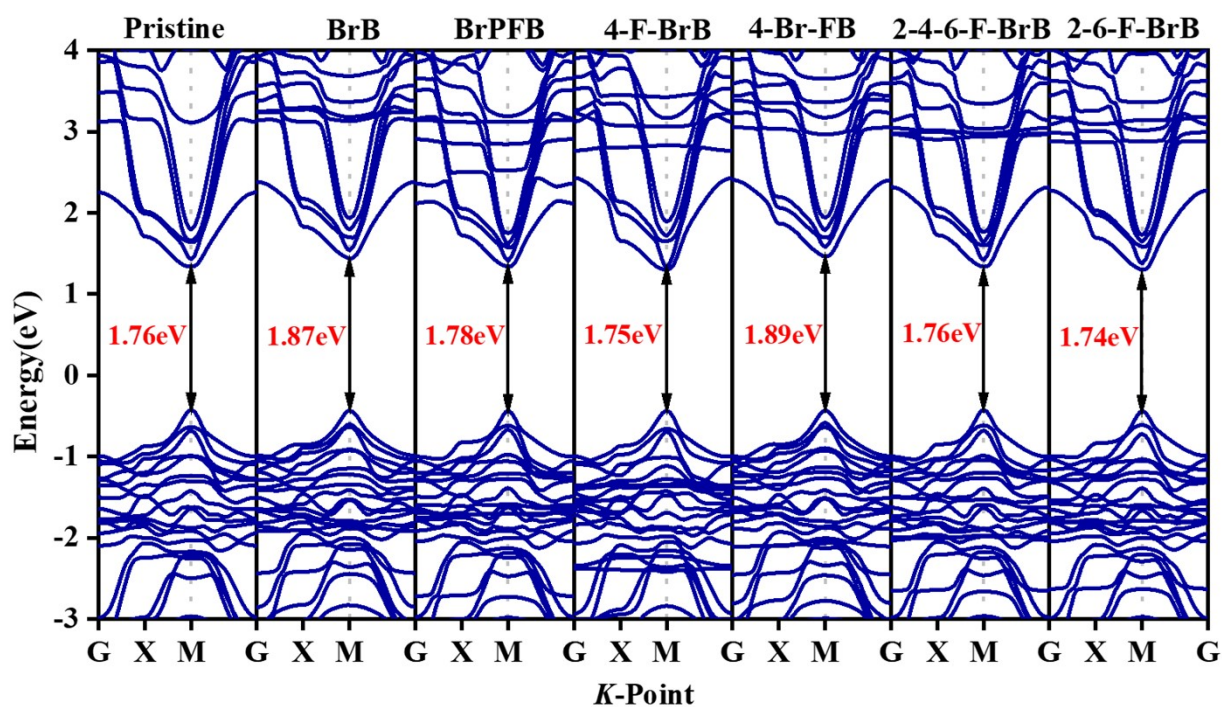

**Fig. S6.** Band structures is displayed at the  $\text{PbI}_2$ -terminated surface with the addition of BrB, BrPFB, 4-F-BrB, 4-Br-FB, 2-4-6-F-BrB, and 2-6-F-BrB, respectively.

**Table S1.** The energy values of LUMO and HOMO of different molecules and the energy values of global reaction activity.

| Molecule    | HOMO(eV) | LUMO(eV) | $\Delta E(\text{eV})$ |
|-------------|----------|----------|-----------------------|
| BrB         | -6.05    | -1.51    | 4.55                  |
| BrPFB       | -6.75    | -2.44    | 4.31                  |
| 4-Br-FB     | -6.07    | -1.85    | 4.22                  |
| 2-4-6-F-BrB | -6.39    | -1.90    | 4.49                  |
| 2-6-F-BrB   | -6.35    | -1.85    | 4.50                  |



**Table S3** Electron ( $m_e$ ) and hole ( $m_h$ ) effective masses, the reduced effective mass( $\mu$ ), high-frequency dielectric constants ( $\epsilon$ ) and exciton binding energies ( $E_g$ ) on the different terminations after adding passivators and the intrinsic structure.

| Terminate        | Compounds          | $m_e(m_0)$ |            | $m_h(m_0)$ |            | $\mu$ | $\epsilon$ | $E_b$ (meV) |
|------------------|--------------------|------------|------------|------------|------------|-------|------------|-------------|
|                  |                    | $\Gamma-X$ | $\Gamma-M$ | $\Gamma-X$ | $\Gamma-M$ |       |            |             |
| MAI              | <i>Cell</i>        | 0.665      | 0.280      | 0.239      | 0.168      | 0.142 | 2.414      | 0.332       |
|                  |                    |            |            | m*=0.11me  |            |       |            |             |
|                  | <i>BrB</i>         | 0.724      | 0.274      | 0.245      | 0.165      | 0.145 | 2.674      | 0.276       |
|                  | <i>BrPFB</i>       | 0.825      | 0.280      | 0.267      | 0.167      | 0.156 | 2.697      | 0.292       |
|                  | <i>4-F-BrB</i>     | 0.748      | 0.279      | 0.240      | 0.168      | 0.146 | 2.663      | 0.2801      |
|                  | <i>4-Br-FB</i>     | 0.834      | 0.278      | 0.249      | 0.165      | 0.151 | 2.678      | 0.287       |
|                  | <i>2-4-6-F-BrB</i> | 0.888      | 0.279      | 0.255      | 0.165      | 0.154 | 2.687      | 0.290       |
|                  | <i>2-6-F-BrB</i>   | 0.788      | 0.278      | 0.252      | 0.165      | 0.150 | 2.680      | 0.284       |
| PbI <sub>2</sub> | <i>Cell</i>        | 0.975      | 0.248      | 0.325      | 0.562      | 0.257 | 4.433      | 0.178       |
|                  | <i>BrB</i>         | 0.724      | 0.274      | 0.245      | 0.165      | 0.145 | 3.170      | 0.196       |
|                  | <i>BrPFB</i>       | 0.825      | 0.280      | 0.267      | 0.167      | 0.156 | 3.334      | 0.191       |
|                  | <i>4-F-BrB</i>     | 0.748      | 0.279      | 0.240      | 0.168      | 0.146 | 3.231      | 0.190       |
|                  | <i>4-Br-FB</i>     | 0.834      | 0.278      | 0.250      | 0.165      | 0.151 | 3.163      | 0.205       |
|                  | <i>2-4-6-F-BrB</i> | 0.888      | 0.279      | 0.255      | 0.165      | 0.154 | 3.305      | 0.192       |
|                  | <i>2-6-F-BrB</i>   | 0.788      | 0.278      | 0.252      | 0.165      | 0.150 | 3.302      | 0.187       |
|                  |                    |            |            |            |            |       |            |             |

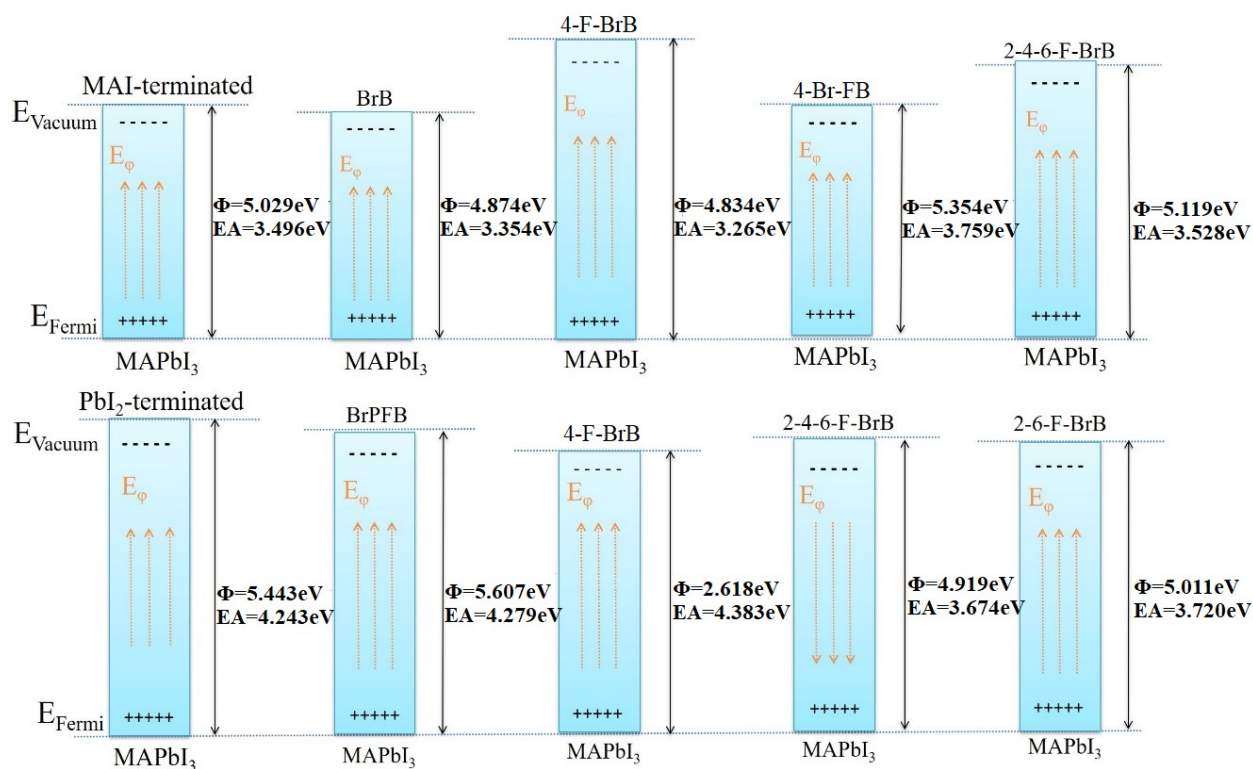

**Fig. S7.** The surface work function of the intrinsic structure and the electron affinity potential(EA) after adsorbing BrB, 4-F-BrB, 4-Br-FB and 2-4-6-F-BrB on the MAI-terminated surface and adsorbing BrPFB, 4-F-BrB, 2-4-6-F-BrB, and 2-6-F-BrB on the PbI<sub>2</sub>-terminated surface.

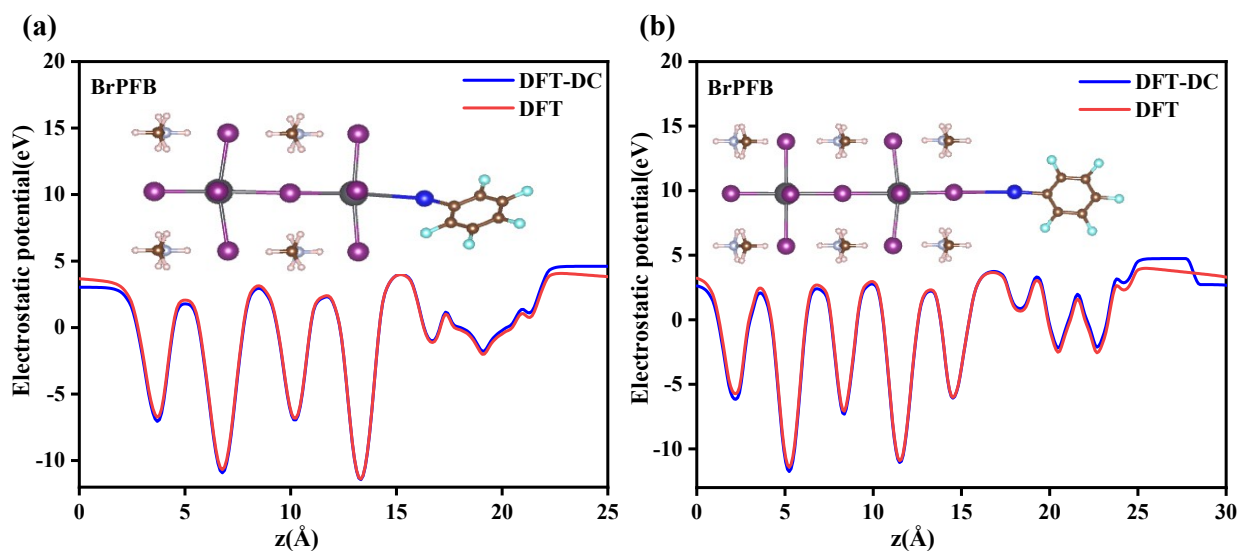

**Fig. S8.** (a) and (b) are the average planar potentials for adsorbing BrPFB at the PbI<sub>2</sub>-terminated and MAI-terminated surfaces, respectively. Blue refers to adding dipole correction during calculation, while red refers to using DFT instead of adding dipole correction during calculation.

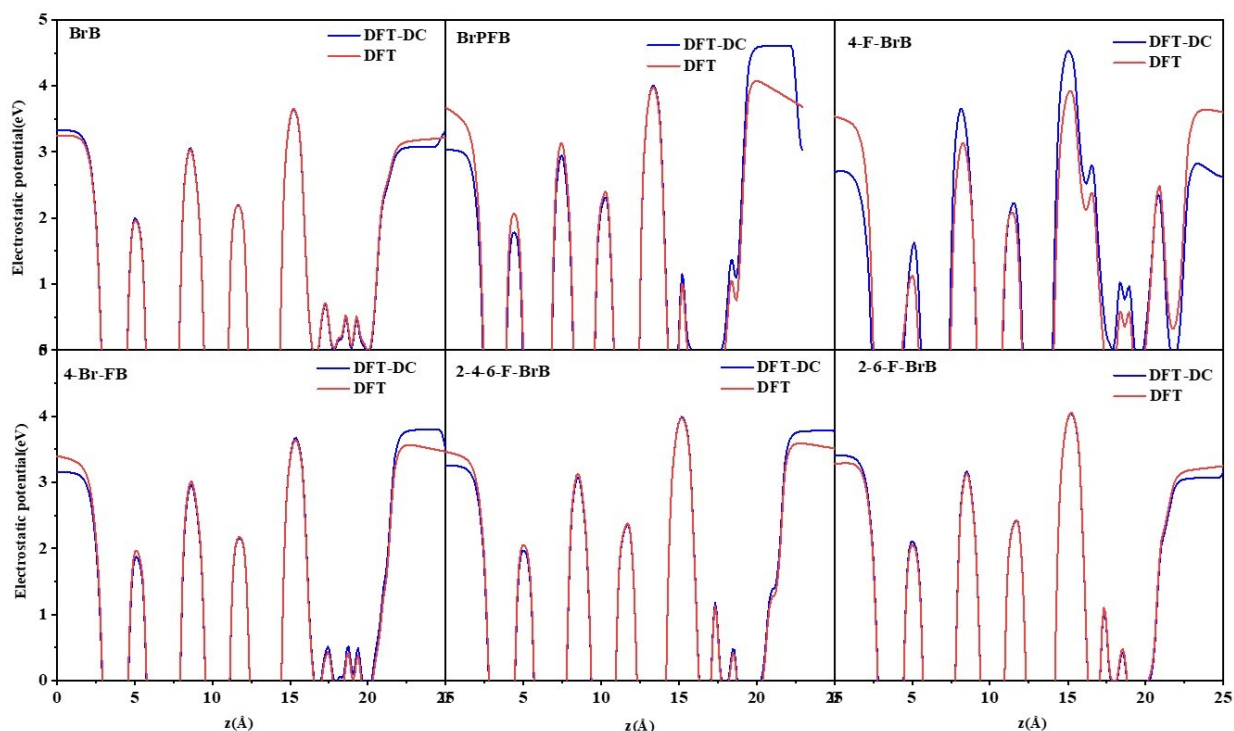

**Fig. S9.** The difference in the planar average potential calculated using dipole correction in the adsorption of small molecules with different F contents at the  $\text{PbI}_2$ -terminated surfaces. Blue refers to adding dipole correction during calculation, while red refers to using DFT instead of adding dipole correction during calculation.

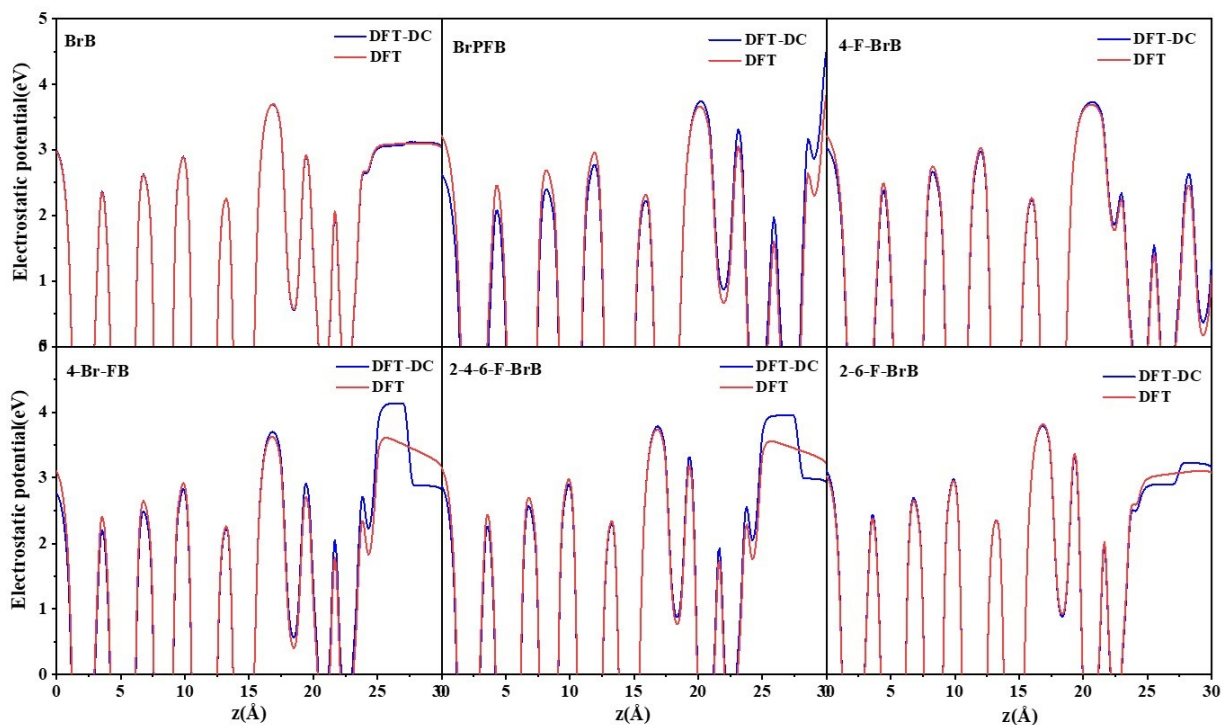

**Fig. S10.** The difference in the planar average potential calculated using dipole correction in the adsorption of small molecules with different F contents at the MAI-terminated surfaces. Blue refers to adding dipole correction during calculation, while red refers to using DFT instead of adding dipole correction during calculation.
